# Supplementary material
Source: PubMed Central journal article supplement (PMC5703204)

**Figure Legends**

**Figure 1.** Proportion of the study groups who successfully completed the online shopping task.

**Figure 2.** Proportion of the study groups who successfully completed the individual online banking items.

**Figure 3.** Correlations between neurocognitive domains and online shopping ( $n = 42$ ) and banking ( $n = 35$ ) total scores in the HAND group.

**Supplemental Figure 1.** Sample user interfaces for the online shopping (a) and financial (b) tasks.

Supplemental Figure 1a.

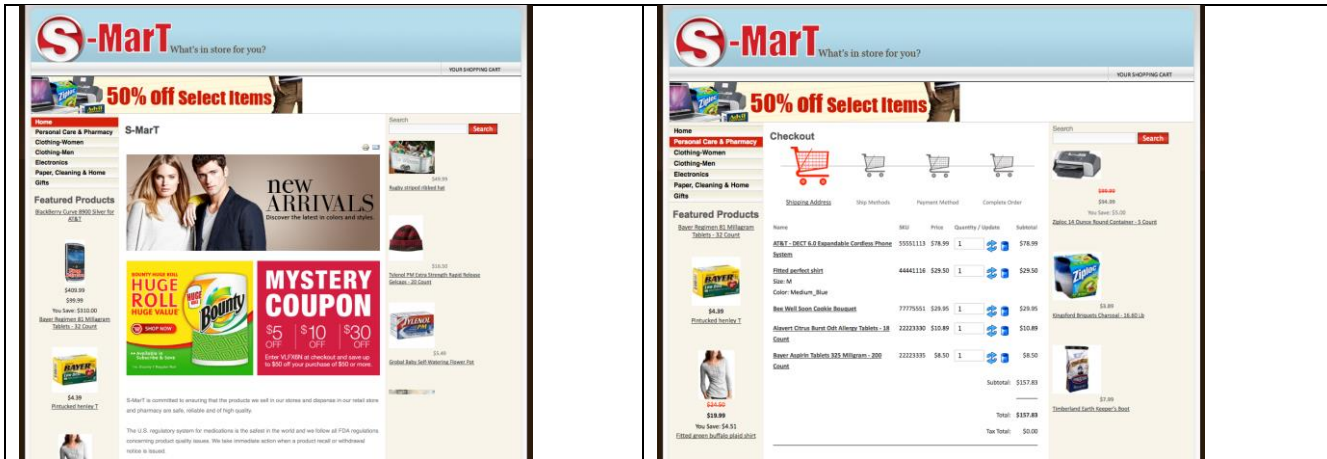

Supplemental Figure 1b.

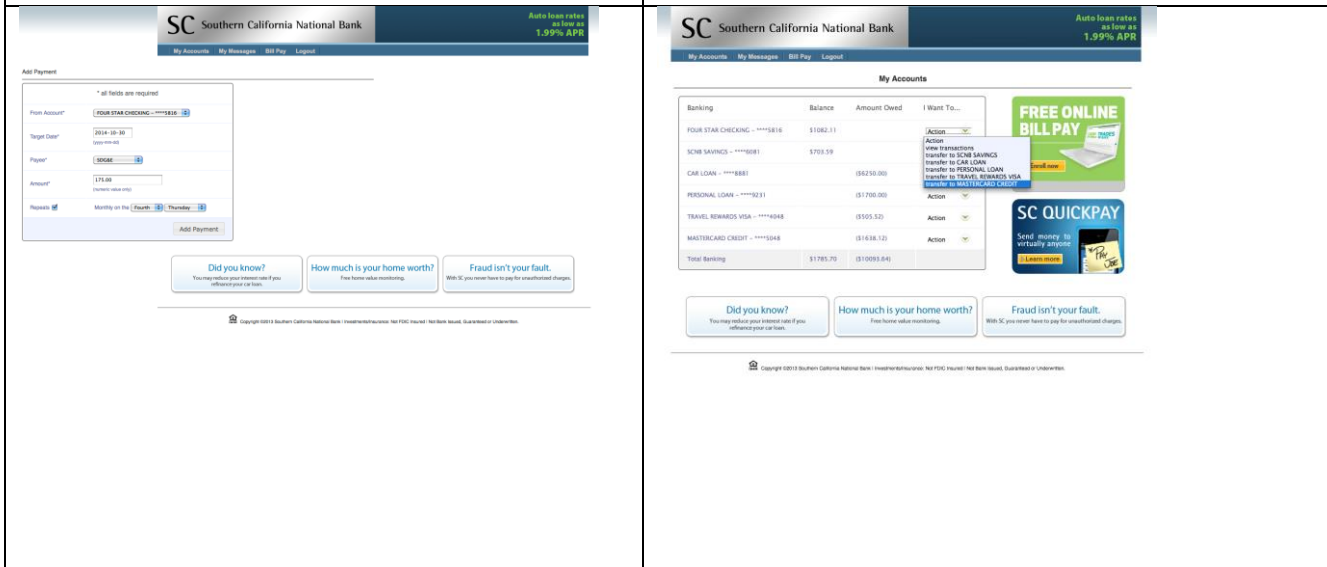

Supplement: NIHMS919604-supplement-supplement_1.pdf [file NIHMS919604-supplement-supplement_1.pdf]
